1 **TITLE PAGE**

2 Title: **Visualization of the initial fixed nitrogen transport in nodulated soybean plant**  
3 **using [<sup>13</sup>N]N<sub>2</sub> tracer gas in real-time**

4

5 **The names of authors: Hung V. P. Nguyen<sup>1,\*</sup>, Hue<sup>1</sup> Tong Thi**

6 **Addresses of the institutions:** <sup>1</sup>Institute of Biotechnology, Hue University, Vietnam

7 \* To whom correspondence should be addressed. Email: [nvphung@hueuni.edu.vn](mailto:nvphung@hueuni.edu.vn)

## 8 **Abstract**

9           The observation of initial transport of fixed nitrogen in intact soybean plants in real-  
10 time was conducted by using the positron-emitting tracer imaging system (PETIS).  
11 Soybean root nodules were fed with [ $^{13}\text{N}$ ]N<sub>2</sub> for 10 minutes, and the radioactivity of [ $^{13}\text{N}$ ]N  
12 tracer was recorded for 60 minutes. The serial images of nitrogen fixation activity and  
13 translocation of fixed nitrogen in the soybean plant were reconstructed to estimate the  
14 fixed-N transport to the upper shoot. As a result, the signal of nitrogen radiotracer moving  
15 upward through the intact stem was successfully observed. This is the first report that the  
16 translocation of fixed-N is visualized in real-time in soybean plant by a moving image. The  
17 signal of nitrogen radiotracer appeared at the base stem at about 20 minutes after the  
18 feeding of tracer gas and it took 40 minutes to reach the upper stem. The velocity of fixed  
19 nitrogen translocation was estimated approximately at 1.63 cm min<sup>-1</sup>. The autoradiography  
20 taken after PETIS experiment showed a clear picture of transport of fixed  $^{13}\text{N}$  in the whole  
21 plant that the fixed-N moved not only via xylem system but also via the phloem system to  
22 the shoot after transferring from xylem to phloem in the stem although it has been generally  
23 considered that the fixed-N in nodule is transported dominantly via xylem by transpiration  
24 stream toward mature leaves. This result also suggests that the initial transport of fixed-N  
25 was mainly into the stem and subsequently translocated to young leaves and buds via the  
26 phloem system. These new findings in the initial transport of fixed nitrogen of soybean by  
27 PETIS observation will become the basis for future study of fixed-N transport in the whole  
28 legume plants.

29 **Keywords:**  $^{13}\text{N}_2$ , positron-emitting tracer imaging system, nitrogen fixation, nodule,  
30 soybean, transport.

31 **Abbreviations:** PETIS: positron-emitting tracer imaging system, ROI: region of interest,  
32 FOV: field of view.

33

34

35

## 36 **Introduction**

37           Biological nitrogen fixation (BNF) is very important not only for plant life  
38 especially in legume plants but also for nitrogen cycling of the globe. One of the most  
39 important characters of the legume plant is that it can use N<sub>2</sub> gas in the atmosphere as a  
40 nutrient source for growth and development via biological fixation pathway in symbiotic  
41 with bacteroids in root nodules. Since, the understanding of biological nitrogen fixation and  
42 fixed nitrogen transport is very important for applying to legume cultivation to increase  
43 crop productivity, so that the dynamic of BNF and fixed-N transport have been concerning  
44 many researchers.

45           In soybean plant, after fixation, a major part of fixed-N is metabolized to ureides in  
46 nodules and then transported to the upper parts including shoots, leaves, and pods via  
47 xylem system and redistributed to pods, seeds, and roots via phloem system (Ohyama et al.,  
48 2009). There are two main routes of fixed-N transport in legume plants. One, the fixed-N is  
49 moved from root nodules via the xylem system to shoot. The other one, the fixed-N after  
50 incorporating into various N compounds in mature leaves moved from the mature leaves to  
51 growth organs or the storage organs by the phloem system (Oghoghorie and Page, 1972).

52           Up to now, various methods have been used in the field of BFN, of which the  
53 positron-emitting tracer imaging system (PETIS) developed in recent decades for  
54 researching in the field of plant nutrition is considered one of the most advanced method.  
55 This method can overcome the obstacle that previous methods could not perform.  
56 Especially, the PETIS system can detect  $\gamma$ -ray created by positron-emitting nuclide and  
57 can observe the movement of labeled elements in living plants in real-time (Kume et al.,  
58 1997). This technique can visualize the dynamic transport and allocation of metabolites at  
59 large distance scales and give information for understanding the whole plant's physiological  
60 response to environmental changes in real-time (Kiser et al., 2008). PETIS was used  
61 successfully in the first real-time images of nitrogen fixation activity in an intact soybean  
62 plant (Ishii et al., 2009), and in the analysis of nitrate transport in soybean (Sato et al.,

63 1999). Recently, by applying mathematical models in quantifying of radioisotope activity  
64 in time course, the rate import and export of radioactive tracers were calculated relatively  
65 accurate in broad bean (Matsuhashi et al., 2005), soybean (Ishii et al., 2009).

66 In this study, PETIS was used to elucidate more clearly the pathway that fixed  
67 nitrogen was transported and translocated in soybean plants in real-time.

## 68 **Materials and Methods**

### 69 *Plant materials and cultures*

70 Soybean (*Glycine max* [L.]Merr. cv. Williams) seeds were sterilized with 70%  
71 ethanol for 30 seconds and sodium hypochlorite solution 0.5% for 5 min and then  
72 thoroughly washed with deionized water. The seeds were inoculated with the suspension of  
73 *Bradyrhizobium japonicum* (strain USDA 110) and sown on a vermiculite tray. Ten days  
74 after sowing, the seedlings were transferred to plastic containers containing 20 L of  
75 nitrogen-free nutrient solution ( $\text{K}_2\text{SO}_4$ :109  $\text{mg L}^{-1}$ ,  $\text{K}_2\text{HPO}_4$ : 8.5  $\text{mg L}^{-1}$ ,  $\text{KCl}$ : 0.935  $\text{mg L}^{-1}$ ,  
76  $\text{CaCl}_2\cdot\text{H}_2\text{O}$ : 183.0  $\text{mg L}^{-1}$ ,  $\text{MgSO}_4\cdot 7\text{H}_2\text{O}$ : 123  $\text{mg L}^{-1}$ ,  $\text{H}_3\text{BO}_4$ : 0.367  $\text{mg L}^{-1}$ ,  $\text{CuSO}_4\cdot 5\text{H}_2\text{O}$ :  
77 0.032  $\text{mg L}^{-1}$ ,  $\text{MnSO}_4$  0.189  $\text{mg L}^{-1}$ ,  $\text{ZnSO}_4\cdot 7\text{H}_2\text{O}$ : 0.144  $\text{mg L}^{-1}$ ,  $\text{NiSO}_4\cdot 6\text{H}_2\text{O}$ : 0.0035  $\text{mg}$   
78  $\text{L}^{-1}$ , ethylenediamine-tetraacetic acid.2Na: 18.6  $\text{mg L}^{-1}$ ,  $\text{FeSO}_4\cdot 7\text{H}_2\text{O}$ : 13.9  $\text{mg L}^{-1}$ ; pH: 6.0).  
79 The new solution was changed every week and aerated by a pump system. Soybean plants  
80 were cultivated in a growth chamber under the conditions of 16 h light at 28°C and 8 h  
81 darkness at 18°C; humidity: 65%; and irradiance: 400  $\mu\text{E m}^{-2} \text{s}^{-1}$  under fluorescence  
82 light-tubes. Twenty-five to thirty day-old plants were used for the  $^{13}\text{N}$  experiments.

### 83 *Synthesis of [ $^{13}\text{N}$ ]N<sub>2</sub> gas*

84 The [ $^{13}\text{N}$ ]N<sub>2</sub> was produced at the cyclotron facilities at TIARA (Japan Atomic  
85 Energy Agency, Takasaki, Gunma, Japan) by bombarding CO<sub>2</sub> for ten minutes with 0.5  $\mu\text{A}$   
86 of 18.3 MeV proton beam delivered from a cyclotron.

87

88

89           The rapid production method of the [ $^{13}\text{N}$ ]N<sub>2</sub> tracer based on a previous study (Ishii  
90 et al., 2009) and some modification was described as follows: 38 mL of pure CO<sub>2</sub> gas was  
91 filled into a target chamber with  $5 \times 10^5$  Pa and then it was irradiated with a proton beam  
92 delivered from a cyclotron. After irradiating, 15 mL of non-radioactive nitrogen gas was  
93 added to the target chamber as the carrier gas in order to carry the N radioactive from the  
94 target chamber to the receiver. The mixed gases after irradiating (including CO<sub>2</sub>, [ $^{13}\text{N}$ ]N<sub>2</sub>,  
95 [ $^{13}\text{N}$ ]N<sub>2</sub>O and N<sub>2</sub>) were purified by passing through a glass column containing soda lime  
96 powder (Soda-lime No.1; Wako Pure Chemical Industries, Osaka, Japan) to absorb all CO<sub>2</sub>,  
97 and then mixed gas went through a glass column containing pure granular copper  
98 (LUDISWISS, Switzerland) placed in a furnace at 600°C to deoxidize [ $^{13}\text{N}$ ]N<sub>2</sub>O to [ $^{13}\text{N}$ ]N<sub>2</sub>.  
99 The purified gas was collected in a syringe for checking contamination by gas  
100 chromatography. After purifying, 25 mL of the pure [ $^{13}\text{N}$ ]N<sub>2</sub> gas was mixed 15 mL non-  
101 radioactive nitrogen and 10 mL O<sub>2</sub> gas to make the final composition of O<sub>2</sub>: N<sub>2</sub> = 2:8 for  
102 the experimental treatment.

### 103 *[ $^{13}\text{N}$ ]N<sub>2</sub> tracer gas treatment and imaging with PETIS*

104           Soybean plants at 26-day-old were fed with [ $^{13}\text{N}$ ]N<sub>2</sub> gas in the PETIS system at  
105 TIARA (Japan Atomic Energy Agency, Takasaki, Gunma, Japan). The PETIS system for  
106 imaging experiment was set up as shown in **figure 1**. The root system of soybean plants  
107 was inserted into an acrylic box and the base stem of the plant at the top of the acrylic box  
108 was sealed by plastic clay to prevent gas leakage. The inlet and outlet of the gases and  
109 solution were connected with silicon tubes and controlled by valves (**Figure 1A**). The  
110 acrylic box was placed in the middle between the two detector heads of PETIS (Modified  
111 type of PPIS-4800; Hamamatsu Photonics, Hamamatsu, Japan) in a growth chamber  
112 (**Figure 1B**) with relative humidity of 65% at 28°C so that the main observation area was  
113 located at the center of the field of view (FOV). The light was maintained at a photon flux  
114 density of approximately  $150 \mu\text{mol photon m}^{-2}\text{s}^{-1}$ .

115           The [ $^{13}\text{N}$ ]N<sub>2</sub> gas treatment was implemented as following steps: First, the root  
116 system of soybean plants was adapted to a non-radioactive gas for 30 min, and then the

117 culture solution in the acrylic box was raised to the inner top of the acrylic box to flush out  
118 the initial gas. Subsequently, 50 mL of solution was drained off and 50 mL of the fed gas  
119 containing [ $^{13}\text{N}$ ]N<sub>2</sub> was introduced to the box at the same time. The  $^{13}\text{N}$  tracer gas was kept  
120 for 10 min in the acrylic box and flushed out by raising the solution in the acrylic box.

121 PETIS imaging was started when [ $^{13}\text{N}$ ]N<sub>2</sub> tracer was filled in the acrylic box. Each  
122 frame (image) was obtained every 10 seconds for 1 hour.

123

124

### Figure 1

125

### 126 *Estimation of nitrogen fixation rates and fixed N transport rate*

127 All PETIS image data were reconstructed and analyzed by using NIH image J 1.45  
128 software. To estimate the dynamic of [ $^{13}\text{N}$ ]N<sub>2</sub> accumulated in nodules and the translocation  
129 of fixed [ $^{13}\text{N}$ ]N<sub>2</sub> from nodules to the upper stem, the regions of interest (ROIs) on the  
130 integrated PETIS images were drawn and extracted at clump of nodules and the time-  
131 activity curves (TACs) were created from ROIs of a series PETIS images in 60 minutes,  
132 these curves were corrected for physical decay of [ $^{13}\text{N}$ ]N<sub>2</sub>. The data of TACs will be used  
133 for estimating the rate import and export of [ $^{13}\text{N}$ ]N<sub>2</sub> at ROIs.

134 To estimate the fixed-N activity, the average radioactivity (Bq) of the first 10  
135 frames after the flushing out of [ $^{13}\text{N}$ ]N<sub>2</sub> tracer gas was calculated and then converted into  
136 the amount of total nitrogen ( $\mu\text{mol N}_2$ ). This value indicates the amount of total nitrogen  
137 fixed by the nodules during 10 minutes of  $^{13}\text{N}$  exposure and was used to estimate the rate of  
138 nitrogen fixation ( $\mu\text{mol N}_2 \text{ h}^{-1}$ ).

139 To analyze the export of fixed nitrogen from the nodules, a linear regression was  
140 made on the data points of the time-activity curve of each sample for 20 minutes from the  
141 end of flushing out of the tracer gas, and the slope of the line was converted to the  
142 decreasing rate of fixed N in nodule ( $\mu\text{mol N}_2 \text{ h}^{-1}$ ).

## 143 **BAS imaging**

144 To obtain autoradiography images, the plants were exposed to the imaging plates of  
145 a bio-imaging analyzer (BAS GUGE 2040, Fujifilm, Tokyo, Japan) for 30 minutes. After  
146 exposure, the plates were scanned with a bio-imaging analyzer system (GE Healthcare,  
147 Typhoon FLA 7000). The autoradiograph image was reconstructed by using the NIH image  
148 J1.45.

## 149 **Results**

150 In the [ $^{13}\text{N}$ ]N<sub>2</sub> tracer experiment using the PETIS system, the nitrogen fixation  
151 activity and the transport of fixed nitrogen are reflected by the [ $^{13}\text{N}$ ]N<sub>2</sub> radioactivity  
152 accumulated at a detected area of the plant. **Figure 2** shows the test plant and serial images  
153 recorded by PETIS after flushing out of [ $^{13}\text{N}$ ]N<sub>2</sub> gas. Due to the small FOV, the detectors  
154 were only concentrated around the upper nodules and lower shoot (**Figure 2A**) to observe  
155 the dynamics of nitrogen fixation in the nodules and transport of the fixed-N to upperparts.  
156 The PETIS images were taken every ten seconds, and **figure 2B** shows the restacked  
157 images in a sequence of 5 minutes (equal to 30 frames) of all frames. It was demonstrated  
158 that just after five minutes exposing to [ $^{13}\text{N}$ ]N<sub>2</sub> gas, the fixed-N has already been at the base  
159 stem and then gradually moved up to shoot (**Figure 2B**).

160

161 **Figure 2:**

162

163 **Figure 3:**

164 The PETIS data was used to analyze the dynamic of nitrogen fixation activity and  
165 the translocation of fixed nitrogen from nodules to shoot. To estimate the nitrogen fixation  
166 rate and transport velocity of fixed nitrogen, the regions of interest (ROIs) were set on the  
167 nodule zone, base stem (ROI1), and upper stem (ROI2) along the stem (**Figure 2A**). **Figure**  
168 **2B** shows the time-activity curve from the nodule zone. It was estimated from the value just

169 after flushing out of the tracer and the subsequent slope that the average rate of nitrogen  
170 fixation was about  $0.538 \mu\text{mol N}_2 \text{ h}^{-1}$  and the export rate of fixed nitrogen from nodules to  
171 the other parts were evaluated to be  $0.017 \mu\text{mol N}_2 \text{ h}^{-1}$  (**Table 1**). The distribution rate of  
172 fixed nitrogen from nodules to base stem (ROI1) and upper stem (ROI2) in the initial time  
173 was low, it was estimated about  $0.0169 \mu\text{mol N}_2 \text{ h}^{-1}$  and  $0.0101 \mu\text{mol N}_2 \text{ h}^{-1}$  at ROI1 (equal  
174 to 3.14% at the base stem) and ROI2, respectively (**Table1**).

175 **Table 1:**

176

177 To estimate the velocity of the initial transport of fixed-N movement in the stem  
178 from root to the shoot, we used the data from TACs at two ROIs to calculate the arrival  
179 time of fixed-N at the base stem (ROI1) and the upper stem (ROI2). **Figure 3C** shows the  
180 time-activity curves (TACs) from the stem zone (ROI1 and ROI2). From the time-lag  
181 between the two TACs, the velocity of movement of fixed nitrogen in the stem was  
182 estimated at  $1.63 \text{ cm min}^{-1}$ .

183 To determine more clearly the transport of fixed nitrogen ( $[^{13}\text{N}]\text{N}_2$  tracer) in  
184 soybean plants we subjected the test plant to the autoradiograph after PETIS investigating.  
185 The photograph and BAS image (**Figure 4**) showed the accumulation of fixed-N in nodules  
186 and translocation of fixed nitrogen to the shoot. The signal of  $[^{13}\text{N}]\text{N}_2$  tracer accumulated in  
187 nodules was still significantly strong; the radioactivity tracer accumulated in the stem was  
188 strong especially at the base stem. This intensity signal was higher in comparison with that  
189 of the PEPTIS image. Especially, in BAS image the signal of  $^{13}\text{N}$  radioactivity was  
190 observed in young leaves and new shoot (top bud) but there was no signal in older leaves  
191 and roots.

192

193 **Figure 4:**

194



## 195 **Discussions**

196       The transportation of fixed nitrogen in legume plants has been studied for a long  
197 time, but this mechanism still needs to be elucidated more precisely. By using the PETIS  
198 method, the movement of fixed nitrogen in the soybean plant was imaged clearly in this  
199 study for the first time. The translocation of fixed nitrogen was observed at base stem at  
200 about five minutes after feeding of  $^{13}\text{N}$  radiotracer and full stem (only in the FOV) at 40  
201 minutes (**Figure 3**). This evidence suggested that fixed-N after synthesized in the nodules,  
202 move to the shoot in a short time, which is similar to a previous result that  $^{13}\text{N}$  was detected  
203 first at the trifoliolate of soybean plant at 5-10 minutes after introducing  $^{13}\text{NO}_3^-$  (Sato et al.,  
204 1999), and  $^{13}\text{N}$  reached at base stem of rice in 2 minute and newest leaf in 6 minutes after  
205 supplying  $^{13}\text{NH}_4^+$  (Kiyomiya et al., 2001). It implies that the timing of movement of the  
206 fixed-N from soybean nodules was not delayed even if it is compared to that of absorbed  
207 nitrogen from the culture solution. In other words, it does not need much time more than a  
208 few minutes to convert  $\text{N}_2$  gas into new nitrogen compounds before starting transport of  
209 them to others. The velocity of the initial transport of fixed- $^{13}\text{N}$  was estimated at 1.63 cm  
210  $\text{min}^{-1}$  at the vegetative stage. This result was similar to previous results found that the speed  
211 of  $^{13}\text{N}$  compound moving in rice plant at vegetative stage was 8.6 cm  $\text{min}^{-1}$  (Kiyomiya et al.,  
212 2001), and the movement of  $^{13}\text{N}$  fixation compounds,  $^{13}\text{NO}_3^-$  and  $^{13}\text{NH}_4^+$  at rate of 6-12 cm  
213  $\text{min}^{-1}$  in alfalfa root and shoot (Cadwell et al., 1984). Therefore, it was suggested that most  
214 of the fixed- $^{13}\text{N}$  is transported smoothly on the transpiration stream in the xylem from root  
215 to shoot as well as nitrate and ammonium.

216       Although the signal intensity of  $^{13}\text{N}$  radioactivity was observed early at the base  
217 stem, it was still weak at the end of PETIS experiment, and the translocation of nitrogen  
218 radioactivity could not be seen in the whole plant because of the limitation of the field of  
219 view (FOV) by PETIS experiment. However, this phenomenon was observed more clearly  
220 by the BAS image (**Figure 4B**) performed after the end of PETIS measurement. In the BAS  
221 image, the signal of N radiotracer was presented only in young leaves and buds (**Figure**  
222 **4B**). This result suggested that fixed-N was transported in priority to upper organs (young

223 leaves and bud) to create new compounds for plant growth rather than transported to mature  
224 leaves. This is consistent with previous results (Hung et al., 2013; Tajima et al., 2004)  
225 found that fixed-<sup>13</sup>N was exported to young upper parts of shoot especially stem more than  
226 lower parts of the shoot.

227         When observing the transport of [<sup>13</sup>N]NO<sub>3</sub> in soybean plant by autoradiography,  
228 Sato et al. (1999) also found that the radioactive signal of <sup>13</sup>N radiotracer was high in young  
229 and mature trifoliolate leaves compared to primary leaves, while the [<sup>13</sup>N]N radiotracer  
230 derived from fixation presented here was only observed in young leaves. This suggested  
231 that the fixed nitrogen was translocated to young leaves and buds, while nitrogen that  
232 absorbed from fertilizer and soil was transported to all shoots especially mature leaves. It  
233 should be also noted in the BAS image that no signal was detected in the nodules and root  
234 of the distal region although many nodules attached there. These nodules were immersed in  
235 the culture solution so that they could not contact [<sup>13</sup>N]N<sub>2</sub> tracer gas and could not directly  
236 fix it. Therefore, this result suggests that the recycling of fixed nitrogen from the shoots to  
237 distant parts of roots and nodules via phloem needs longer than 60 minutes.

238         The most important finding in the BAS image pointed out that we could not observe  
239 the <sup>13</sup>N radioactive signal in the old leaves although they were close to the source of fixed  
240 nitrogen (nodules). This evidence strongly confirmed that fixed-N is transported directly to  
241 new vegetative organs and this makes us change the concept that the fixed-N translocation  
242 through the shoot may not move only in xylem system as the previous concept that the  
243 fixed N in nodule is transported through xylem by transpiration stream by mature leaves  
244 (Ohyama et al., 2008; Pate et al., 1979a; Pate et al., 1979b), but the fixed N may be  
245 transferred from xylem to phloem in the stem. In the case of fixed N transport, the initial  
246 transport of fixed N was mainly in the stem and translocated to young leaves and buds via  
247 the phloem system.

248         The new finding in the initial transport of fixed nitrogen of soybean will become the  
249 basis for the next study of fixed N transport in legume plants. However, this is the first

250 result found by using the  $^{13}\text{N}$  radioisotope method so that it is necessary to do more studies  
251 to determine where and how is the fixed nitrogen transferred from the xylem system to the  
252 phloem system and transported in stem?

### 253 **Acknowledgment:**

254 We are thankful to Radiotracer Imaging Group, Department of Radiation-Applied Biology,  
255 Takasaki Advanced Radiation Research Institute, Quantum Beam Science Research Directorate  
256 National Institutes for Quantum and Radiological Science and Technology, Japan for their  
257 facilities support and for providing valuable guidance's concerning project implementation.

258

### 259 **References**

- 260 Hung, N. V. P., Watanabe, S., Ishikawa, S., Ohtake, N., Sueyoshi, K., Sato, T., Ishii, S.,  
261 Fujimaki, S., and Ohyama, T., 2013. Quantitative analysis of the initial transport of  
262 fixed nitrogen in nodulated soybean plants using  $^{15}\text{N}$  as a tracer. *Soil Science and*  
263 *Plant Nutrition* **59**, 888-895.
- 264 Ishii, S., Ito, N. S. S., Ishioka, N. S., Kawachi, N., Ohtake, N., Ohyama, T., and Fujimaki,  
265 S., 2009. Real-time imaging of nitrogen fixation in an intact soybean plant with  
266 nodules using  $^{13}\text{N}$ -labeled nitrogen gas. *Soil Science and Plant Nutrition* **55**, 660-  
267 666.
- 268 Keutgen, N., Matsushashi, S., Mizuniwa, C., Itoa, T., Fujimura, T., Ishioka, N. S.,  
269 Watanabea, S., Sekine, T., Uchida, H., and Hashimoto, S., 2002. Transfer function  
270 analysis of positron-emitting tracer imaging system (PETIS) data. *Applied*  
271 *Radiation and Isotopes* **57**, 225-233.
- 272 Kiser, M. R., Reid, C. D., Crowell, A. S., Phillips, R. P., and Howell, C. R., 2008.  
273 Exploring the transport of plant metabolites using positron-emitting radiotracers.  
274 *HFSP Journal* **2**, 189-204.

- 275 Kume, T., Matsubashi, S., Shimazu, M., Ito, H., Adachi, T. F. K., Uchida, H., Shigeta, N.,  
276 Matsuoaka, H., Osa, A., and Sekine, T., 1997. Uptake and transport tracer ( $^{18}\text{F}$ ) of  
277 positron-emitting in plants. *Appl. Radiat. Isot. Vol. 48~ No. 8* **48**, 1035-1043.
- 278 Layzell, D. B., and Larue, T. A., 1982. Modeling C and N transport to developing soybean  
279 fruits. *Plant Physiol* **70**, 1290-1298.
- 280 Matsubashi, S., Fujimaki, S., Kawachi, N., Sakamoto, K., Ishioka, N. S., and Kume, T.,  
281 2005. Quantitative modeling of photoassimilate flow in an intact plant using the  
282 positron-emitting tracer imaging system (PETIS). *Soil Sci. Plant Nutr.* **61**, 417-423.
- 283 McClure, P. R., and Israel, D. W., 1979. Transport of nitrogen in the xylem of soybean  
284 plants. *Plant Physiol* **64**, 411-416.
- 285 Oghoghorie, C. G. O., and Page, J. S., 1972. Exploration of the nitrogen transport system of  
286 a nodulated legume using  $^{15}\text{N}$ . *Planta* **104**, 35-49.
- 287 Ohyama, T., Kaushal, T., Ohtake, N., Sueyoshi, K., Sato, T., Nagumo, Y., Takahashi, Y.,  
288 Ito, S., Nishigaki, T., and Ishii, S., 2008. Nitrogen fixation and metabolism in  
289 soybean plants. *Nova Science Publisher, Inc. New York*, 16-109.
- 290 Ohyama, T., OHTAKE, N., Sueyoshi, K., Tewari, K., Takahashi, Y., Ito, S., Nishiwaki, T.,  
291 Nagumo, Y., Ishii, S., and Sato, A., 2009. Nitrogen Fixation and Metabolism in  
292 Soybean Plants. *Nova Science Publishers, Inc. New York*, 1-131.
- 293 Pate, J. S., Atkins, C. A., Hamel, K., McNeil, D. L., and Layzell, D. B., 1979. Transport of  
294 organic solutes in phloem and xylem of a nodulated legume. *Plant Physiol* **63**,  
295 1082-1088.
- 296 Pate, J. S., Atkins, C. A., Rainbird, R. M., and Woo, K. C., 1980. Nitrogen nutrition and  
297 xylem transport of nitrogen in ureide-producing grain legumes. *Plant Physiol* **65**,  
298 961-965.
- 299 Pate, J. S., McNeil, D. L., and Layzell, D. B., 1979. Modeling the transport and utilization  
300 of carbon and nitrogen in a nodulated legume. *Plant Physiol* **63**, 730-737.
- 301 Tajima, S., Nomura, M., and Kouchi, H., 2004. Ureide biosynthesis in legume nodules.  
302 *Frontiers in Bioscience* **9**, 1374-1381.

303

304

## Tables

305 **Table 1: Evaluation of nitrogen fixation rate and export rate of fixed-N ( $\mu\text{mol N}_2 \text{h}^{-1}$ )**

| Plant     | N fixation rate<br>( $\mu\text{mol N}_2 \text{h}^{-1}$ ) | Fixed N export<br>rate<br>( $\mu\text{mol N}_2 \text{h}^{-1}$ ) | Fixed N distribution<br>( $\mu\text{mol N}_2 \text{h}^{-1}$ ) |               |
|-----------|----------------------------------------------------------|-----------------------------------------------------------------|---------------------------------------------------------------|---------------|
|           |                                                          |                                                                 | ROI1                                                          | ROI2          |
| 1         | 0.6054                                                   | 0.0148                                                          | 0.0147                                                        | 0.0064        |
| 2         | 0.5278                                                   | 0.0173                                                          | 0.0211                                                        | 0.0146        |
| 3         | 0.5560                                                   | 0.0194                                                          | 0.0118                                                        | 0.0061        |
| 4         | 0.4626                                                   | 0.0166                                                          | 0.02018                                                       | 0.0163        |
| Mean (SE) | 0.5380±0.0298                                            | 0.0170±0.0010                                                   | 0.0169±0.0022                                                 | 0.0106±0.0025 |

306

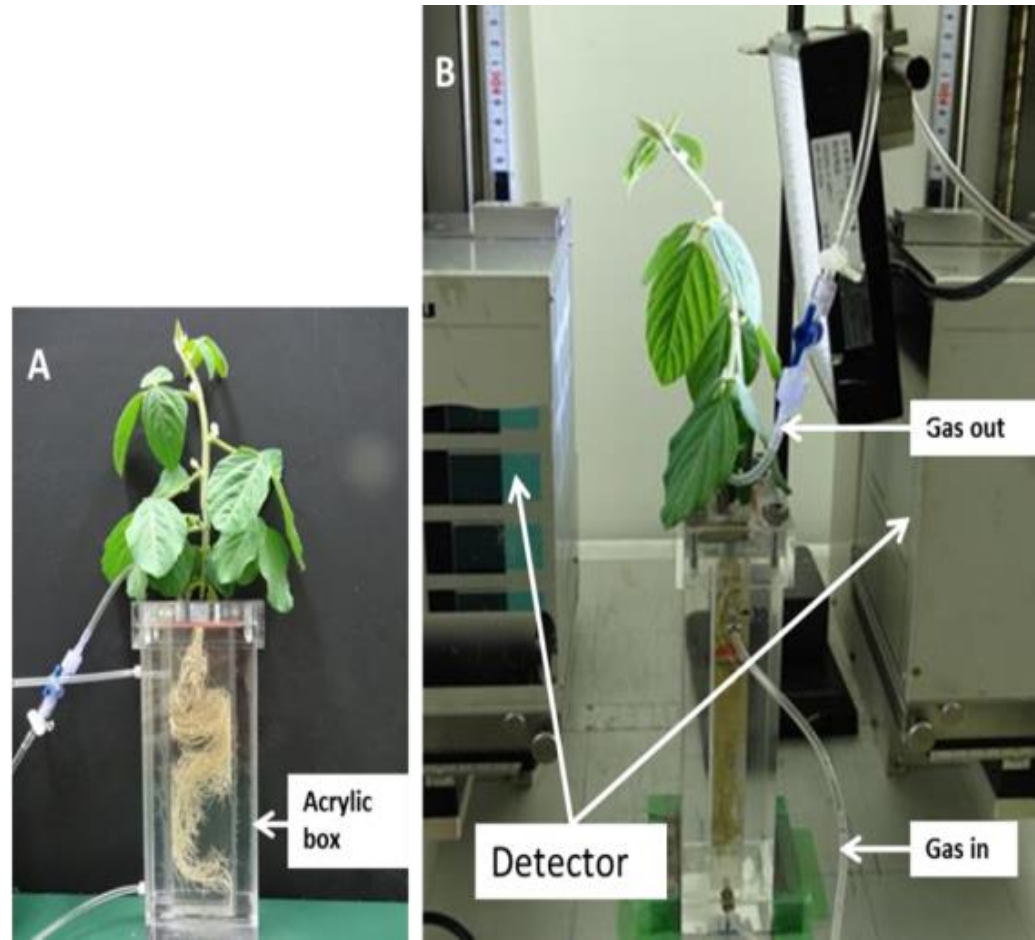

**Figure 1: Soybean plant was set up for  $[^{13}\text{N}]\text{N}_2$  experiment.**

A: The test soybean plant in an acrylic box.

B: PETIS imaging System



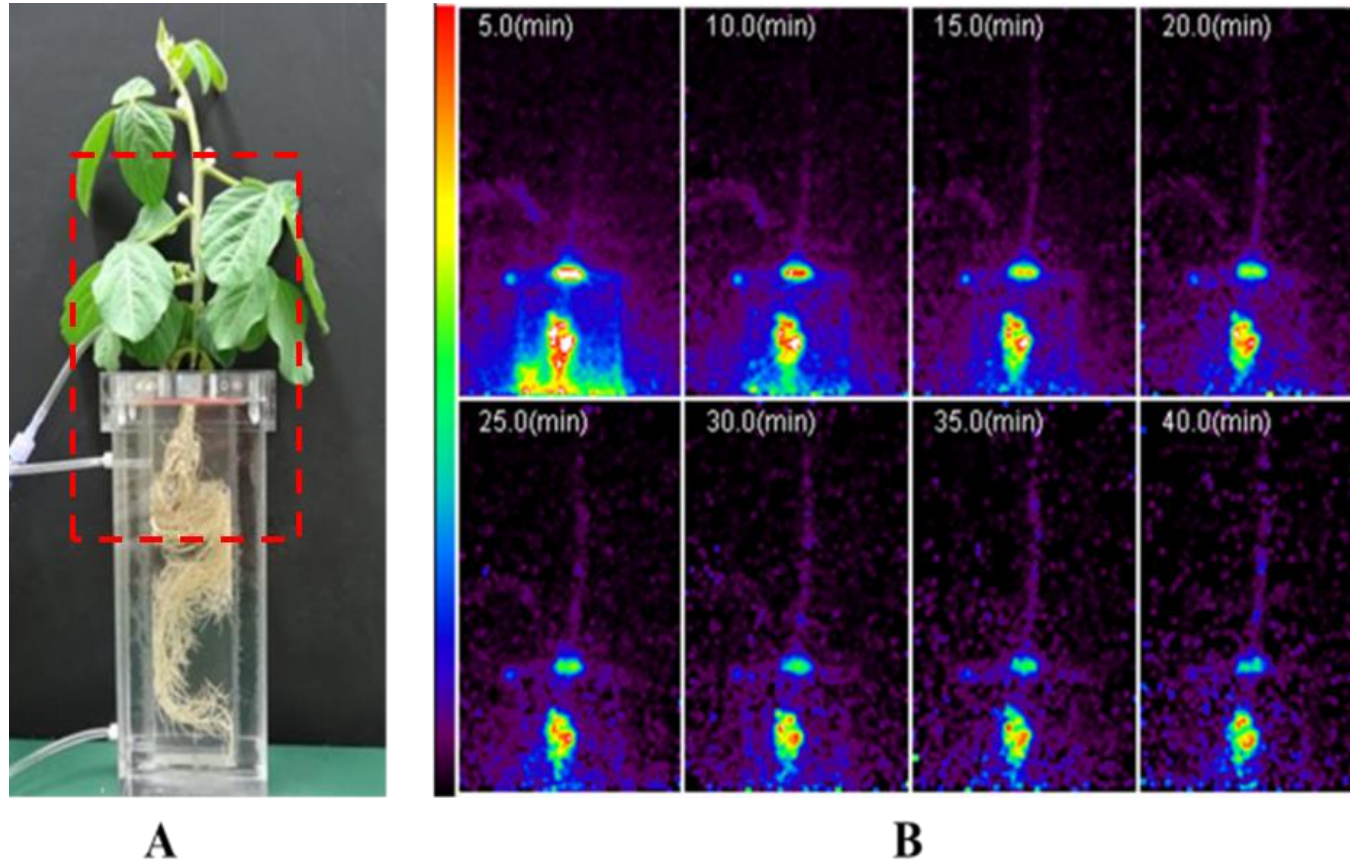

**Figure 2: Figure 2: The test plant and Serial PETIS images of the  $^{13}\text{N}$  movement in the soybean shoot.**

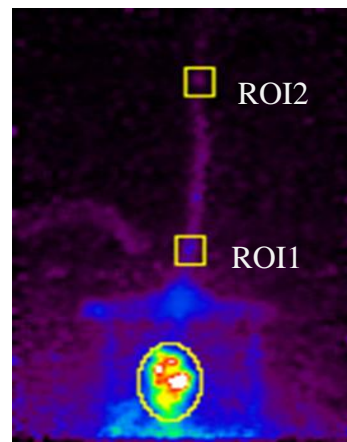

**A**

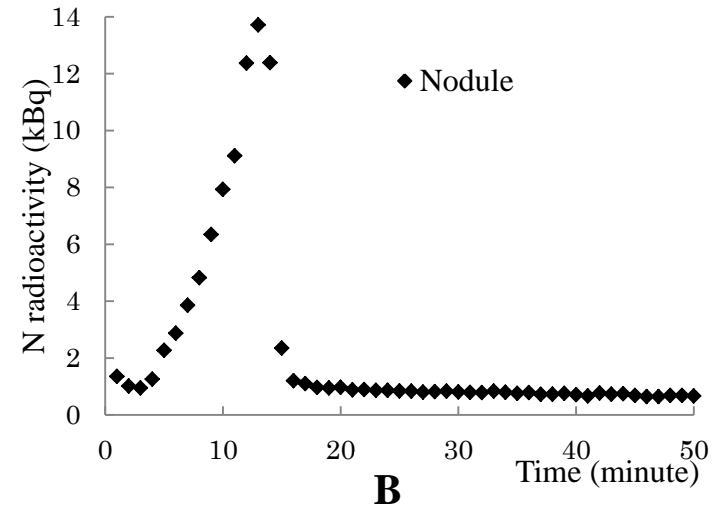

**B**

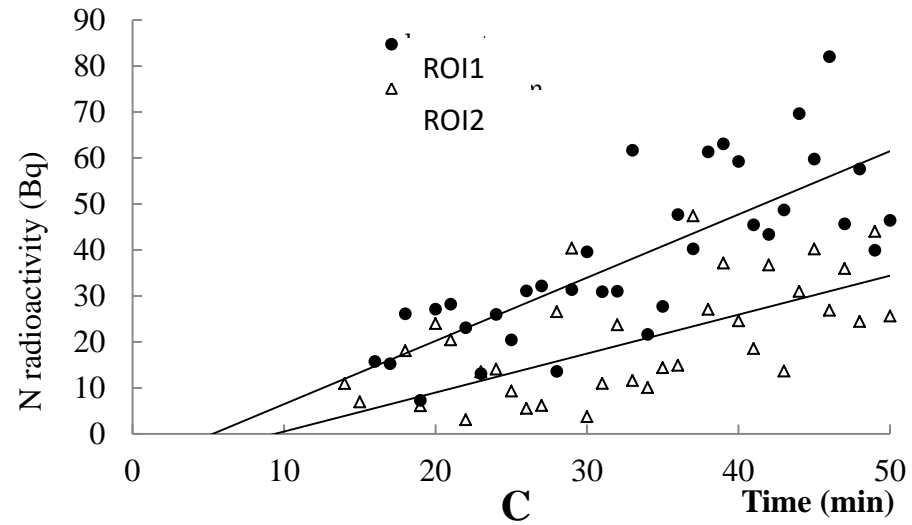

**C**

**Figure 3: Analysis of time-activity curves generated from PETIS data.**

A: Two selected ROIs on PETIS image; ROI1 is at the base stem and ROI2 is at the upper stem.

B: The time-activity curves showing the fixed N accumulated at nodules.

C: The time-activity curves showing the fixed N accumulated at two ROIs



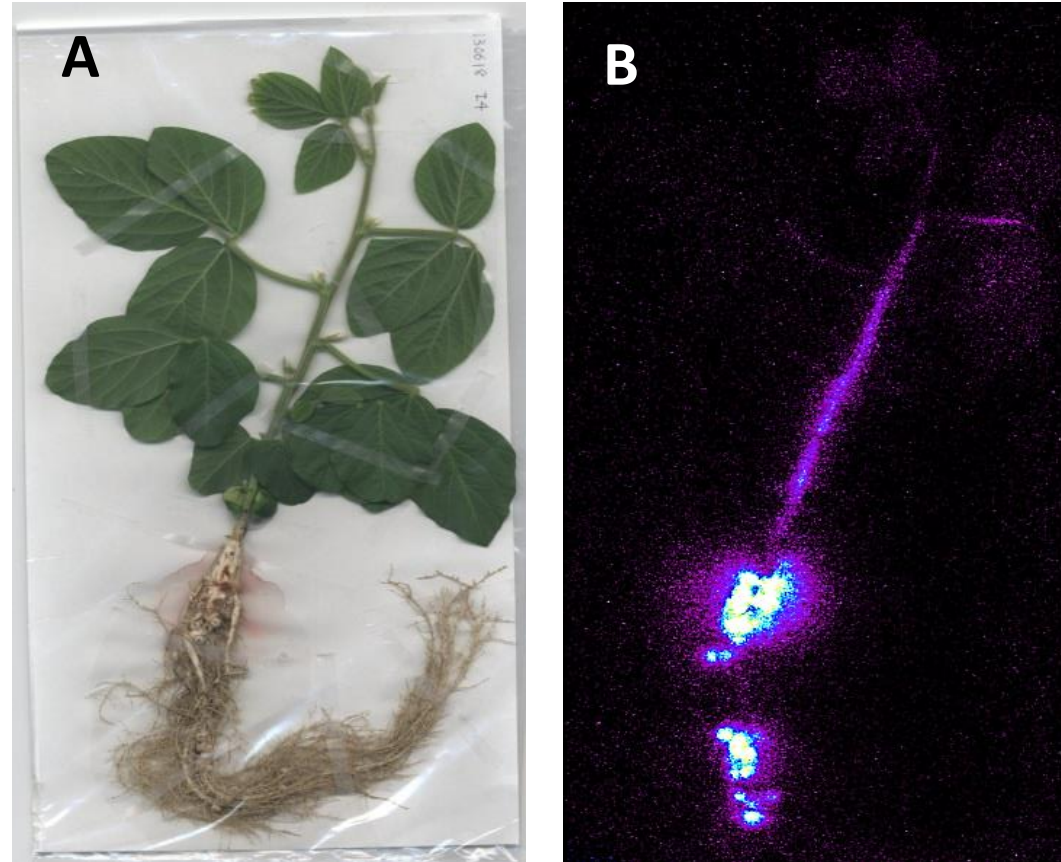

**Figure 4: Figure 4: The photograph and autoradiograph of the test soybean plant**  
**A:** Photograph of soybean plant at 26 DAPs  
**B:** Autoradiograph

## Parsed Citations

Hung, N. V. P., Watanabe, S., Ishikawa, S., Ohtake, N., Sueyoshi, K., Sato, T., Ishii, S., Fujimaki, S., and Ohyama, T., 2013. Quantitative analysis of the initial transport of fixed nitrogen in nodulated soybean plants using <sup>15</sup>N as a tracer. *Soil Science and Plant Nutrition* 59, 888-895.

Pubmed: [Author and Title](#)

Google Scholar: [Author Only Title Only Author and Title](#)

Ishii, S., Ito, N. S. S., Ishioka, N. S., Kawachi, N., Ohtake, N., Ohyama, T., and Fujimaki, S., 2009. Real-time imaging of nitrogen fixation in an intact soybean plant with nodules using <sup>13</sup>N-labeled nitrogen gas. *Soil Science and Plant Nutrition* 55, 660-666.

Pubmed: [Author and Title](#)

Google Scholar: [Author Only Title Only Author and Title](#)

Keutgen, N., Matsuhashi, S., Mizuniwa, C., Ito, T., Fujimura, T., Ishioka, N. S., Watanabe, S., Sekine, T., Uchida, H., and Hashimoto, S., 2002. Transfer function analysis of positron-emitting tracer imaging system (PETIS) data. *Applied Radiation and Isotopes* 57, 225-233.

Pubmed: [Author and Title](#)

Google Scholar: [Author Only Title Only Author and Title](#)

Kiser, M. R., Reid, C. D., Crowell, A. S., Phillips, R. P., and Howell, C. R., 2008. Exploring the transport of plant metabolites using positron-emitting radiotracers. *HFSP Journal* 2, 189-204.

Pubmed: [Author and Title](#)

Google Scholar: [Author Only Title Only Author and Title](#)

Kume, T., Matsuhashi, S., Shimazu, M., Ito, H., Adachi, T. F. K., Uchida, H., Shigeta, N., Matsuoka, H., Osa, A., and Sekine, T., 1997. Uptake and transport tracer (<sup>18</sup>F) of positron-emitting in plants. *Appl. Radiat. Isot.* Vol. 48~ No. 8 48, 1035-1043.

Pubmed: [Author and Title](#)

Google Scholar: [Author Only Title Only Author and Title](#)

Layzell, D. B., and Larue, T. A., 1982. Modeling C and N transport to developing soybean fruits. *Plant Physiol* 70, 1290-1298.

Pubmed: [Author and Title](#)

Google Scholar: [Author Only Title Only Author and Title](#)

Matsuhashi, S., Fujimaki, S., Kawachi, N., Sakamoto, K., Ishioka, N. S., and Kume, T., 2005. Quantitative modeling of photoassimilate flow in an intact plant using the positron-emitting tracer imaging system (PETIS). *Soil Sci. Plant Nutr.* 61, 417-423.

Pubmed: [Author and Title](#)

Google Scholar: [Author Only Title Only Author and Title](#)

McClure, P. R., and Israel, D. W., 1979. Transport of nitrogen in the xylem of soybean plants. *Plant Physiol* 64, 411-416.

Pubmed: [Author and Title](#)

Google Scholar: [Author Only Title Only Author and Title](#)

Oghoghorie, C. G. O., and Page, J. S., 1972. Exploration of the nitrogen transport system of a nodulated legume using <sup>15</sup>N. *Planta* 104, 35-49.

Pubmed: [Author and Title](#)

Google Scholar: [Author Only Title Only Author and Title](#)

Ohyama, T., Kaushal, T., Ohtake, N., Sueyoshi, K., Sato, T., Nagumo, Y., Takahashi, Y., Ito, S., Nishigaki, T., and Ishii, S., 2008. Nitrogen fixation and metabolism in soybean plants. Nova Science Publisher, Inc. New York, 16-109.

Pubmed: [Author and Title](#)

Google Scholar: [Author Only Title Only Author and Title](#)

Ohyama, T., OHTAKE, N., Sueyoshi, K., Tewari, K., Takahashi, Y., Ito, S., Nishiwaki, T., Nagumo, Y., Ishii, S., and Sato, A., 2009. Nitrogen Fixation and Metabolism in Soybean Plants. Nova Science Publishers, Inc. New York, 1-131.

Pubmed: [Author and Title](#)

Google Scholar: [Author Only Title Only Author and Title](#)

Pate, J. S., Atkins, C. A., Hamel, K., McNeil, D. L., and Layzell, D. B., 1979. Transport of organic solutes in phloem and xylem of a nodulated legume. *Plant Physiol* 63, 1082-1088.

Pubmed: [Author and Title](#)

Google Scholar: [Author Only Title Only Author and Title](#)

Pate, J. S., Atkins, C. A., Rainbird, R. M., and Woo, K. C., 1980. Nitrogen nutrition and xylem transport of nitrogen in ureide-producing grain legumes. *Plant Physiol* 65, 961-965.

Pubmed: [Author and Title](#)

Google Scholar: [Author Only Title Only Author and Title](#)

Pate, J. S., McNeil, D. L., and Layzell, D. B., 1979. Modeling the transport and utilization of carbon and nitrogen in a nodulated legume. *Plant Physiol* 63, 730-737.

Pubmed: [Author and Title](#)

Google Scholar: [Author Only Title Only Author and Title](#)

Tajima, S., Nomura, M., and Kouchi, H., 2004. Ureide biosynthesis in legume nodules. *Frontiers in Bioscience* 9, 1374-1381.

Pubmed: [Author and Title](#)

Google Scholar: [Author Only Title Only Author and Title](#)
